# Supplementary material
Source: publisher figshare collection journal article supplement (https://asha.figshare.com/articles/dataset/_/28590227)

**Supplemental Material S2.** Using math and the brain to predict language recovery after stroke.

# Using math and the brain to predict language recovery after stroke

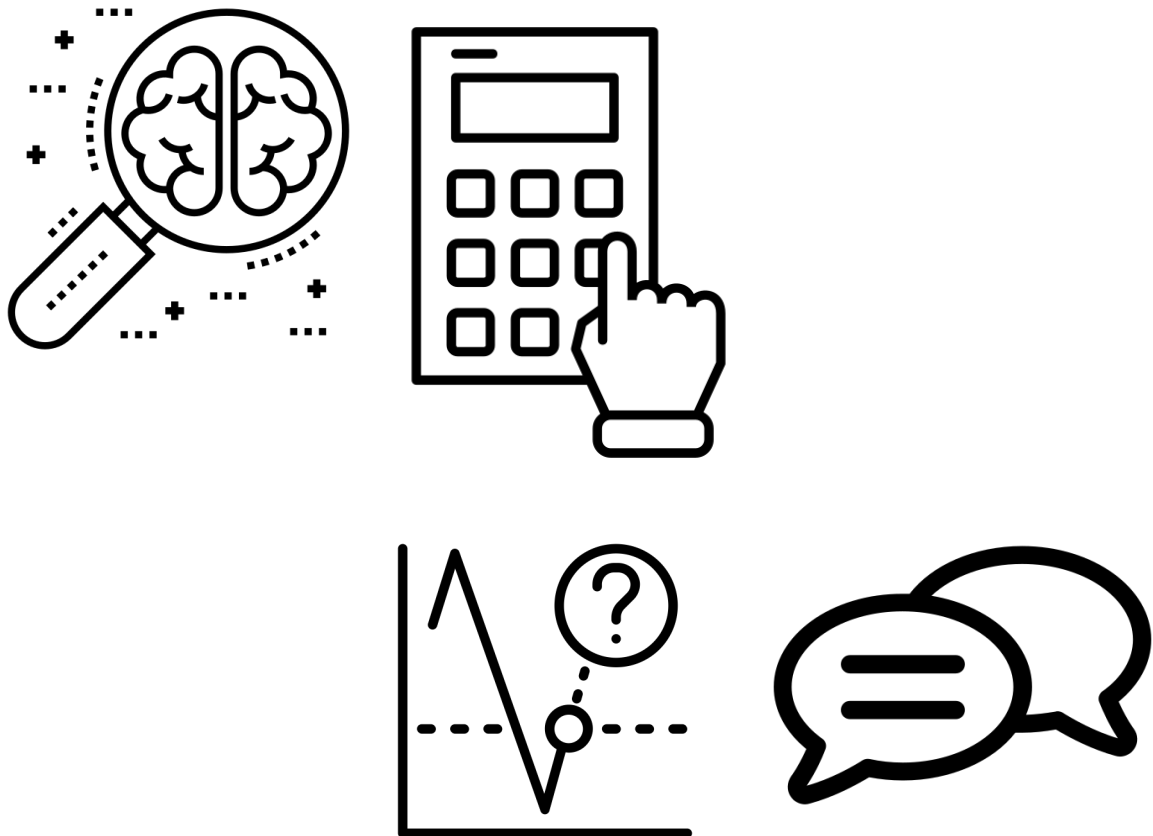

***Supplementary Figure 1: Aphasia-friendly manuscript.***

*An accessible version of “Multivariate lesion-symptom mapping for predicting trajectories of recovery from aphasia” designed for individuals with aphasia and their loved ones.*

# Abstract / Summary

- **Aphasia** is a **problem** with **language** that can happen after **stroke**

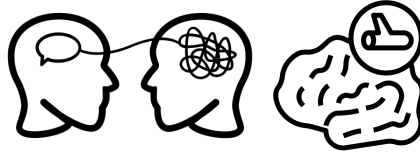

- Language usually **gets better**, but we can't always **predict** **how much**

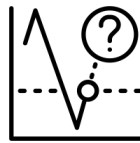

- We looked at a **big group** of **people** with **aphasia**, their **brains**, and their **language**

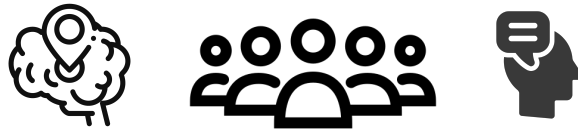

- We used **math** to try and **predict language** across the **first year** after stroke

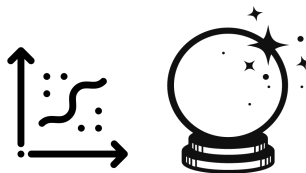

- This math did a **pretty good job** making predictions (about **60%** correct)!

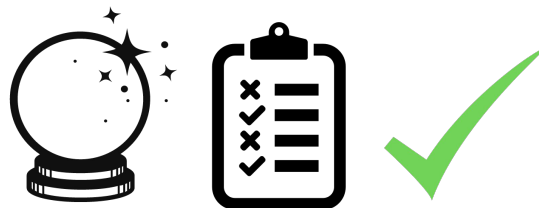

- We **hope** that more math like this will **help** doctors, therapists, researchers, and people with aphasia have **clearer expectations** about **aphasia recovery**

# Introduction (1):

## What we know about aphasia recovery

- **Aphasia** is a **problem** with **language** that can happen after **stroke** — usually on the **left** side of the **brain**

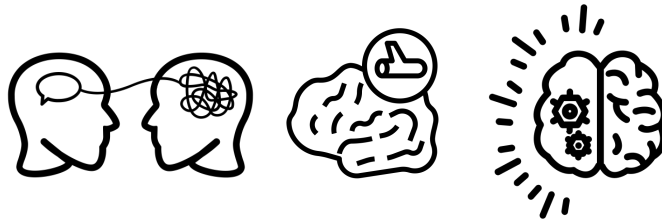

- Aphasia almost always **gets better**, but we **can't** always **predict how much**

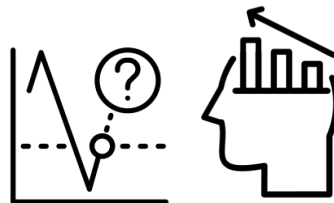

- Strokes can happen in different **parts** of the **brain**

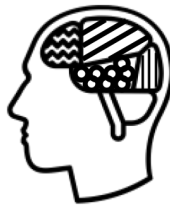

- Usually **where** a stroke happened **tells** us the **most** about **language** over **time**

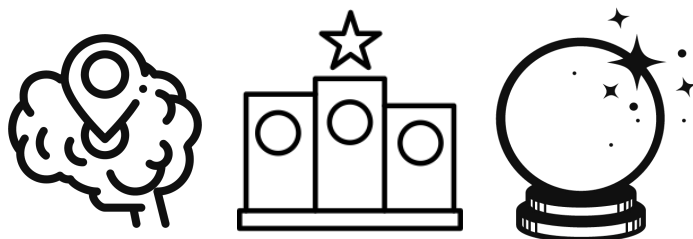

# Introduction (2):

## Why we want to know more

- It would be **good** to be able to **predict language** after **stroke** for lots of people, like...

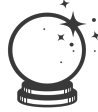

- **People** with **aphasia** (to know what to **expect**)

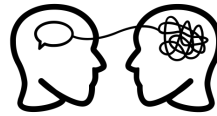

- Their **family** and **friends** (to help **support** and **plan**)

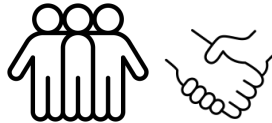

- **Doctors** and **therapists** (to help **inform** and **treat** their patients)

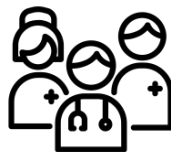

- **Researchers** (to better **understand** language and the brain)

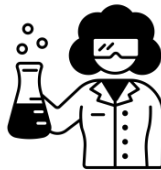

- Other **scientists** have **tried** this **before**, but we had some **new ideas** about how to do it!

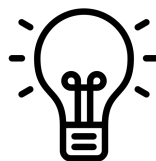

# Introduction (3):

## What we did in this study

- In this study, we use a special type of **math** (called *SVR*) to take things we **know** about people **right after stroke**, like...

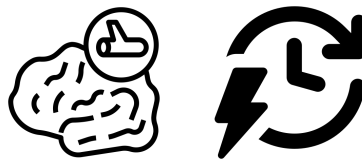

- Their **age** and **education**

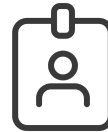

- Their **brain scans**

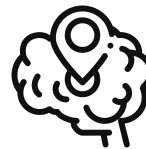

- Their **language** abilities

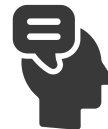

- ...and **predict** what **language** will be like at **later times after stroke**

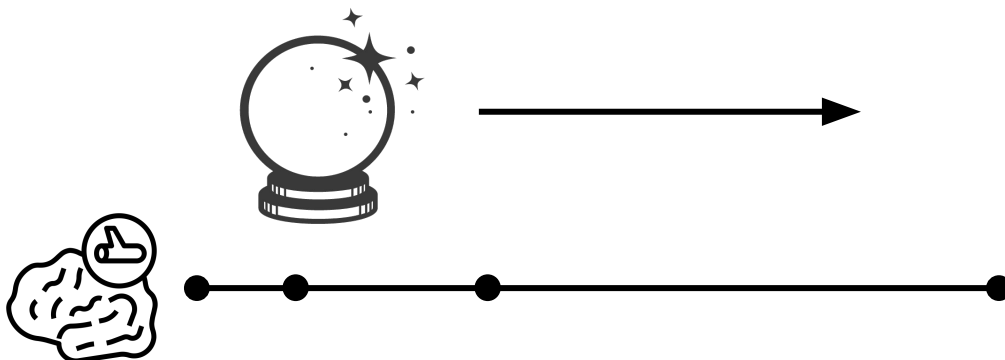

# Methods (1):

## Getting data from right after a stroke

- We met **217 people** with **aphasia** a few **days after** a **stroke**

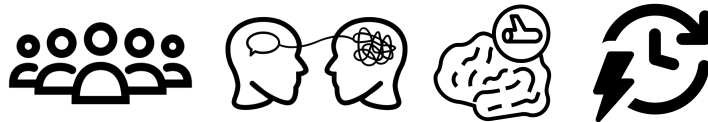

- We got **permission** to include them in this study

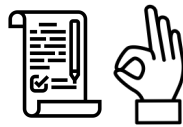

- We **tested** their **language** using a test called the **Quick Aphasia Battery (QAB)**

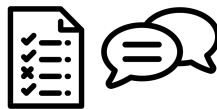

- We used a **computer program** to **highlight** the **stroke** on pictures of their **brains**

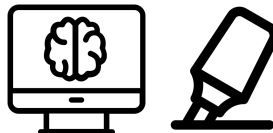

- We wrote code to **count** how much **damage** was in **different parts** of the **brain**

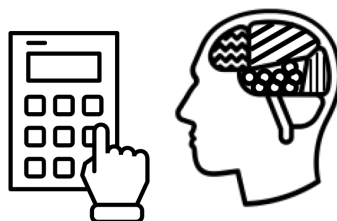

## Methods (2):

### Getting more data later on

- We tried to **follow up** with each person **3 more times**...

- **1 month** after their stroke

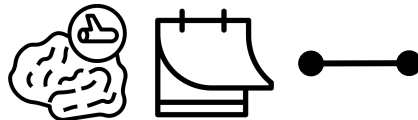

- **3 months** after their stroke

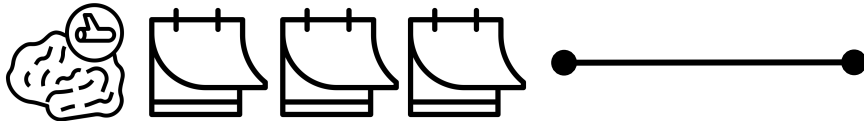

- **1 year** after their stroke

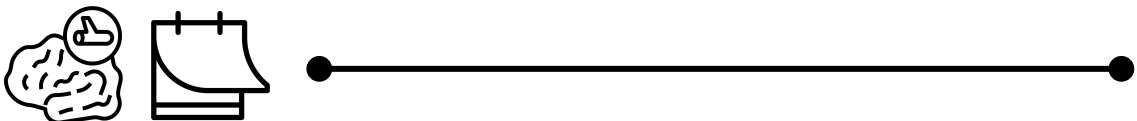

- ...and give them the **same** language **test** (the **QAB**)

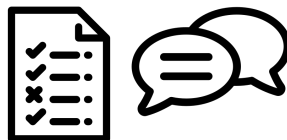

## Methods (3):

### Using math to make predictions

- We used a **special** kind of **math** (called *SVR*) to predict language **scores** based on each **person** and their **brain**

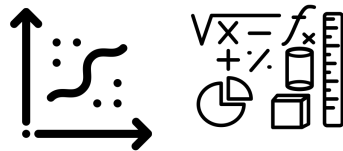

- We did this **2 DIFFERENT WAYS**:
  - **NOT USING** information about the person's **language** right after stroke

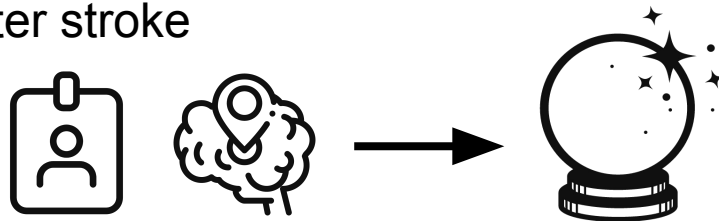

- **USING** information about the person's **language** right after stroke

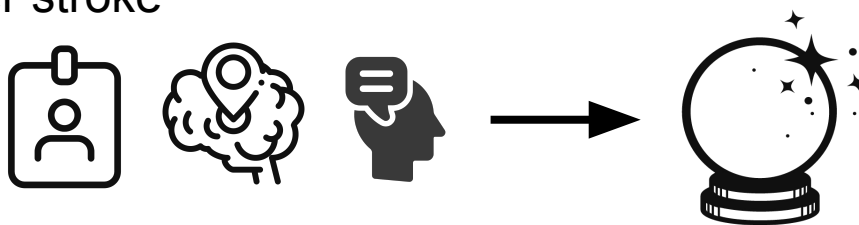

- We then **compared** each **prediction** to each person's **real language score** to see **how well** we did!

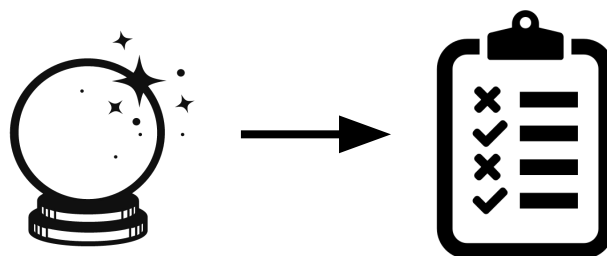



# Results (1): Predicting from person and brain data only

- When we **ONLY** used data on each **person** and their **brain** (**NOT** on their **language**), we did a **pretty good job** predicting overall language

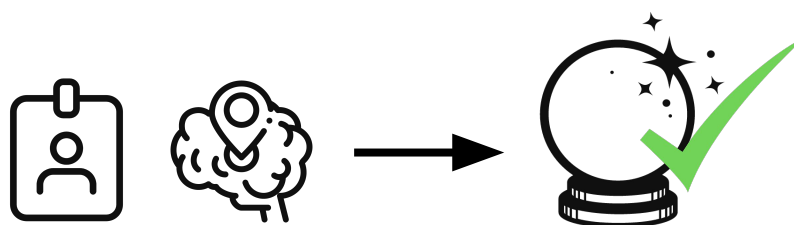

- We did differently at different times...
  - Around **38%** accurate **right after** stroke
  - Around **41%** accurate **1 month** after stroke
  - Around **46%** accurate **3 months** after stroke
  - Around **59%** accurate **1 year** after stroke

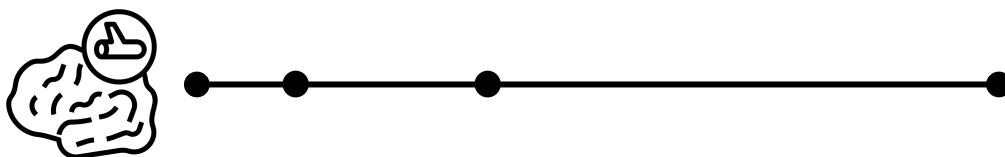

- ...but information about the **brain** was **important** at all of them

## Results (2): Predicting from person, brain, and language data

- When we **ALSO** used information about **language** right after stroke (**plus** information on the **person** and their **brain**), we (again) did a **pretty good job!**

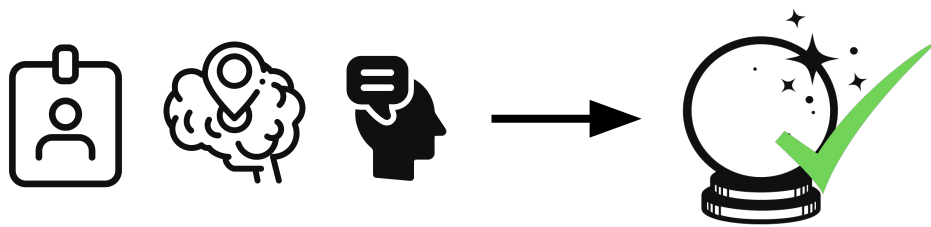

- We (again) did differently at different times...
  - Around **64%** accurate **1 month** after stroke
  - Around **58%** accurate **3 months** after stroke
  - Around **60%** accurate **1 year** after stroke

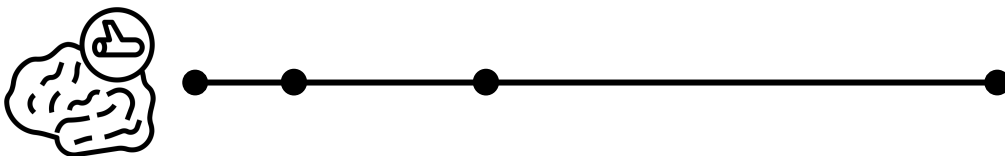

- ...but information about the **brain** was (still!) **important** at all of them

## Results (3):

What parts of the brain matter most?

- Certain **parts** of the **brain** helped us the **most** to make good predictions about language 1 year after stroke

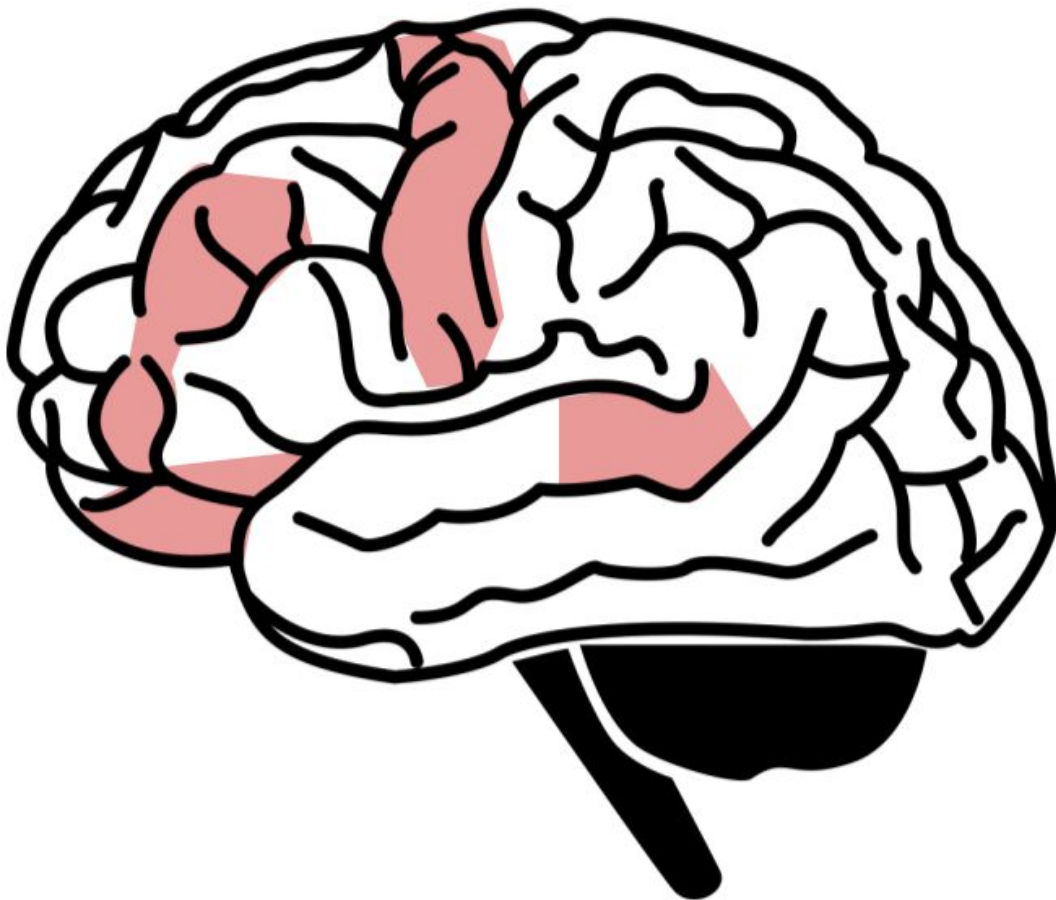

# Discussion (1):

## Main ideas

- We think this is the **first study** to **predict language recovery** over **time** in this way

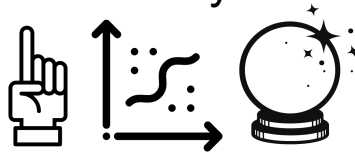

- It was **easier** to predict certain **parts** of **language**, like coming up with words

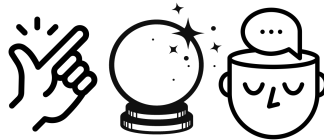

- It was **harder** to **predict** other **parts** of **language**, like reading and understanding words

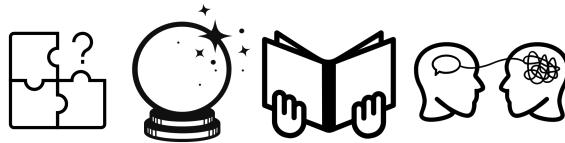

- Using information about the **brain** always helped us make **better predictions** in all cases

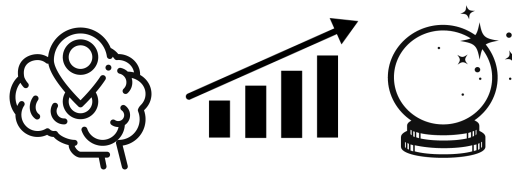

## Discussion (2): Why this matters

- What we found both **makes sense with** and **expands on** older studies

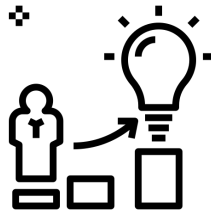

- We think our study is **important** because it will **help** people know what to **expect** in **aphasia recovery**

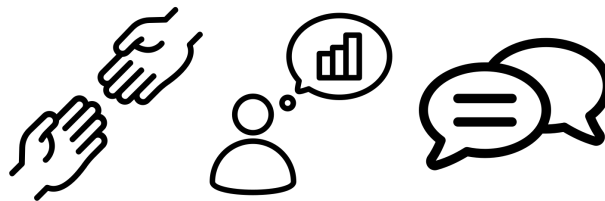

- We tried our best to do a really **thorough** job!

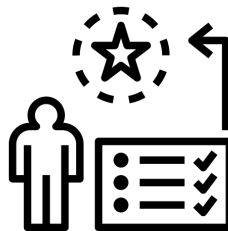

## Discussion (3):

### Limitations / things to think about

- The **QAB language test** is **short** and **doesn't cover everything** there is to know about language

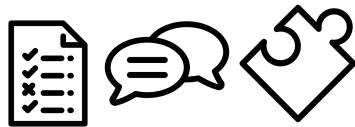

- How a **stroke** looks on a brain image **can change over time**

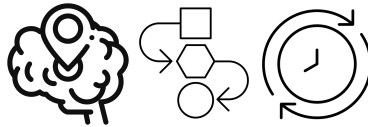

- **Not everyone** we met right after stroke **came back** for a **follow up** language test

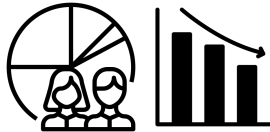

- Some **scientists** do this **math** in slightly **different ways**, so might get slightly different results

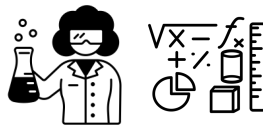

- There is still **a lot to learn** about what this kind of **math** can tell us about specific parts of the **brain**

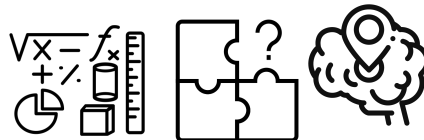

# Conclusion

- This is the **first study** to make **predictions** about **language recovery** across the first **year** of **aphasia** after stroke using data from the **brain**

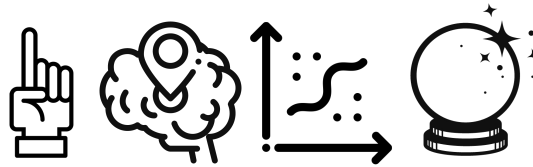

- We learned that knowing about the **brain** can tell us a lot (about **60%**) of what people can **expect** in recovery from **aphasia**!

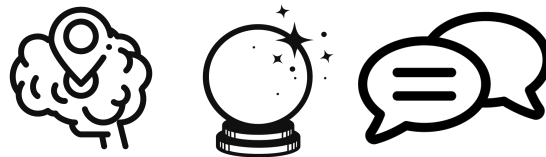

- **This** information (**plus more** we are thinking about!) could **help** lots of people to have **clearer expectations** about recovery

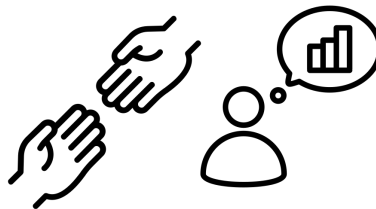

- We plan to write **more studies** about this **soon**!

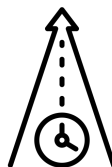

Supplement: Supplementary file 3 [file 1]
