# Supplementary material
Source: publisher figshare collection journal article supplement (https://asha.figshare.com/articles/dataset/_/28590227)

**Supplemental Material S3.** Helpful aphasia group at Vanderbilt.

## **Helpful Aphasia Group at Vanderbilt**

**Authors:** Deborah F Levy, Anna V Kasdan, Katherine M Bryan, Stephen M Wilson,  
Michael de Riesthal, Dominique P Herrington

An accessible version of:

**Designing and Implementing a Community Aphasia  
Group: An Illustrative Case Study of the Aphasia  
Group of Middle Tennessee**

The **Aphasia Group** helps people with chronic aphasia.

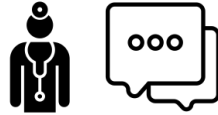

The group is part of **Vanderbilt University** in Nashville.

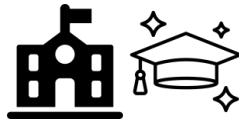

It has been running for **17 years**.

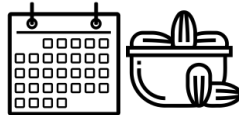

The group's methods and results are shared.

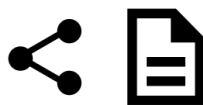

Members and their families **like** the group a lot.

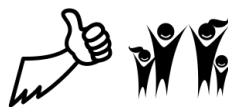

This group could guide **new aphasia groups**.

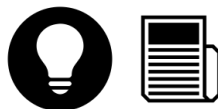

Supplement: Supplementary file 1 [file 1]
