# Supplementary material
Source: publisher figshare collection journal article supplement (https://asha.figshare.com/articles/dataset/_/28590227)

**Supplemental Material S4.** Predicting speech recovery after stroke.

## **Predicting Speech Recovery After Stroke**

**Authors:** Deborah F Levy, Jillian L Entrup, Sarah M Schneck, Caitlin F Onuscheck, Maysaa Rahman, Anna Kasdan, Marianne Casilio, Emma Willey, L Taylor Davis, Michael de Riesthal, Howard S Kirshner, Stephen M Wilson

An accessible version of:

**Multivariate lesion symptom mapping for predicting trajectories of recovery from aphasia**

This study looked at **speech recovery** after a **stroke**.

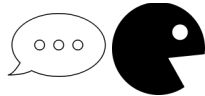

Researchers tested **217 patients** with **aphasia**, a language problem.

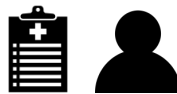

**Three tests** were done: right away, at 1 month, 3 months, and 1 year.

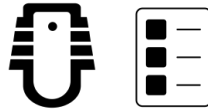

They used a math model with **brain images** and personal details to guess recovery.

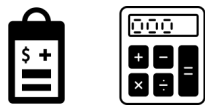

The model could guess recovery after 1 year about **60% right**.

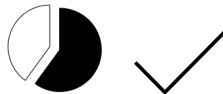

The guesses got better when they included how bad the **aphasia** was at first.

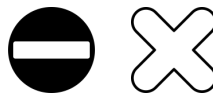

Overall, the method could help guess how well a person might get their language back.

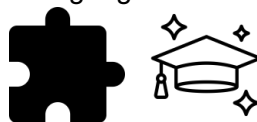

Supplement: Supplementary file 2 [file 1]
